# Supplementary material
Source: Springer Nature journal article supplement (https://www.springermedizin.de/resource/supplementary/12936_2011_2066_MOESM7_ESM.pdf/9543464)
Supplement: MOESM7 [file 9543464]

**Yearly 1-59 month child malaria deaths prevented (x 1 000)**

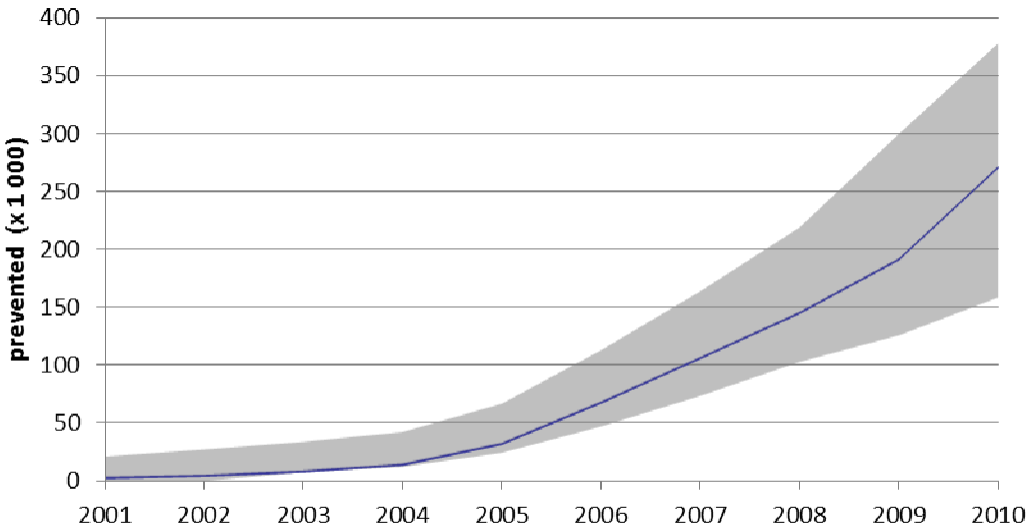

■ Uncertainty

■ Estimated child malaria deaths prevented
